# Supplementary material for: Internal hive temperature as a means of monitoring honey bee colony health in a migratory beekeeping operation before and during winter
Source: Springer Nature journal article supplement (doi:10.1007/s13592-017-0512-8), 2017-05-17
Supplement: 13592_2017_512_MOESM3_ESM.pdf [file 13592_2017_512_MOESM3_ESM.pdf]

**Internal hive temperature as a means of monitoring honey bee colony health in a migratory  
beekeeping operation before and during winter**

William G. Meikle\*, Milagra Weiss, Patrick W. Maes, William Fitz, Lucy A. Snyder, Tim Sheehan,  
Brendon M. Mott, Kirk E. Anderson

Carl Hayden Bee Research Center, 2000 E. Allen Rd, Tucson, AZ 85719, USA

**\*corresponding author:**

**Email address:** [william.meikle@ars.usda.gov](mailto:william.meikle@ars.usda.gov)

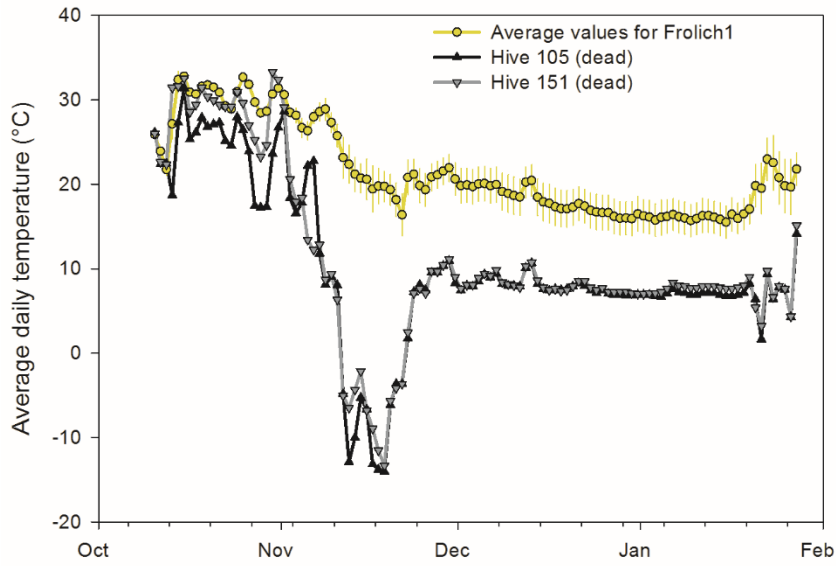

**Figure S1.** Temperature changes in hives which died during overwintering compared to average values for surviving hives in the same treatment (Frolich1).

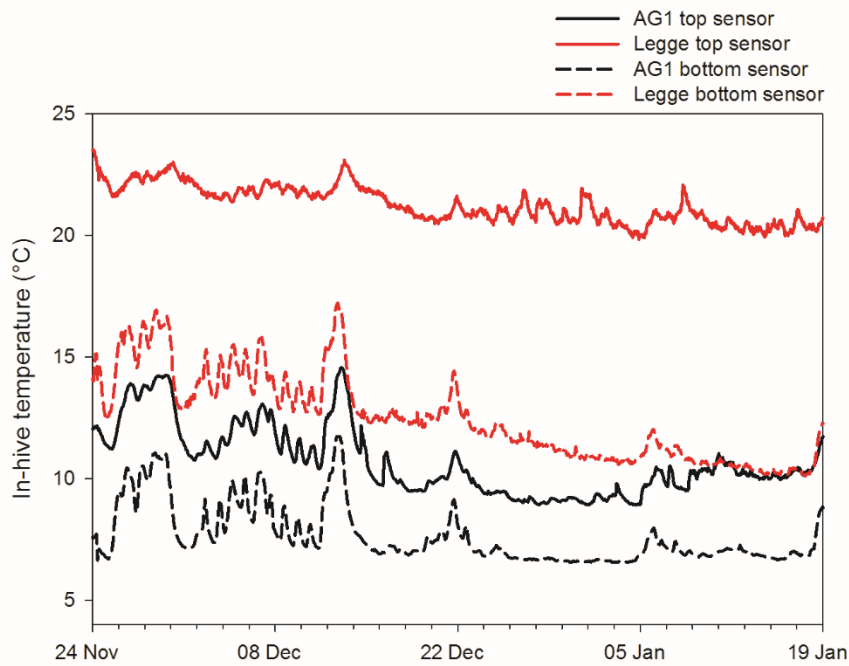

**Figure S2.** Average hive temperature for Legge (red lines) and AG1 (black lines) treatment groups (see text for details) at the top of the middle frame (solid lines) and the bottom of the middle frame (dashed lines) in a warehouse of roughly constant temperature in Firth ID (see text for details).

**Table S1.** Statistical results from 2014-15 experiment for three different time periods: Fall, Winter and Post-winter. “Transf.” refers to the data transformation to improve normality and “Brood area” refers to the surface area of capped brood.

| Period      | Dates               | Dep. var.            | Transf.        | Factors                                  | Num. d.f. | Den. d.f. | F       | P       |       |
|-------------|---------------------|----------------------|----------------|------------------------------------------|-----------|-----------|---------|---------|-------|
| Fall        | 10 Oct.-<br>21 Nov. | Temp. ampl.          | log            | Treatment                                | 1         | 67.6      | 9.93    | 0.0024  |       |
|             |                     |                      |                | Date                                     | 8         | 77.5      | 10.47   | <0.0001 |       |
|             |                     |                      |                | Treatment*Date                           | 8         | 77.5      | 1.20    | 0.3113  |       |
|             |                     |                      |                | Fall ad. mass                            | 1         | 53.3      | 0.01    | 0.9881  |       |
|             | Temp. avg           | none                 | Treatment      | 1                                        | 42.5      | 13.64     | 0.0006  |         |       |
|             |                     |                      | Date           | 8                                        | 74.7      | 181.27    | <0.0001 |         |       |
|             |                     |                      | Treatment*Date | 8                                        | 74.7      | 6.01      | <0.0001 |         |       |
|             |                     |                      | Fall ad. mass  | 1                                        | 1         | 0.02      | 0.9008  |         |       |
| Winter      | 22 Nov.-<br>18 Jan. | Temp. avg            | none           | Treatment                                | 1         | 46.6      | 13.78   | 0.0007  |       |
|             |                     |                      |                | Date                                     | 11        | 117.1     | 12.34   | <0.0001 |       |
|             |                     |                      |                | Treatment*Date                           | 11        | 117.1     | 1.34    | 0.0240  |       |
|             |                     |                      |                | Post-winter ad. mass                     | 1         | 52.2      | 27.55   | <0.0001 |       |
| Post-winter | 19-26<br>Jan.       | Temp. ampl.          |                | Treatment, Date,<br>Post-winter ad. mass |           |           |         | NS      |       |
|             |                     |                      |                | Temp. avg                                | none      | Treatment | 1       | 42.1    | 11.10 |
|             |                     | Date                 |                | 1                                        |           | 40        | 3.38    | 0.0733  |       |
|             |                     | Treatment*Date       |                | 1                                        |           | 40        | 10.36   | 0.0026  |       |
|             |                     | Post-winter ad. mass |                | 1                                        | 39        | 29.38     | <0.0001 |         |       |

**Table S2.** Statistical results from 2015-16 for three different time periods: Fall, Winter and Post-winter. “Transf.” refers to the data transformation to improve normality and “ad. mass” refers to the total adult bee mass.

| Period      | Dates               | Dep. var.   | Transf. | Factors                                  | Num. d.f. | Den. d.f.            | F    | P      |       |         |
|-------------|---------------------|-------------|---------|------------------------------------------|-----------|----------------------|------|--------|-------|---------|
| Fall        | 1 Sept.-<br>15 Nov. | Temp. ampl. |         | Treatment, Date,<br>Fall ad. mass        |           |                      |      | NS     |       |         |
|             |                     |             |         | Temp. avg                                | none      | Treatment            | 2    | 86.2   | 5.49  | 0.0057  |
|             |                     |             |         |                                          |           | Date                 | 15   | 199    | 36.26 | <0.0001 |
|             |                     |             |         |                                          |           | Treatment*Date       | 30   | 302.8  | 2.25  | 0.0003  |
|             |                     |             |         | Fall ad. mass                            | 1         | 80.16                | 1.59 | 0.2105 |       |         |
| Winter      | 16 Nov.-<br>31 Jan. | Temp. avg   |         | Treatment, Date,<br>Post-winter ad. mass |           |                      |      | NS     |       |         |
| Post-winter | 1-5 Feb.            | Temp. ampl. |         | Treatment, Date,<br>Post-winter ad. mass |           |                      |      | NS     |       |         |
|             |                     |             |         | Temp. avg                                | none      | Treatment            | 2    | 55     | 11.50 | <0.0001 |
|             |                     |             |         |                                          |           | Post-winter ad. mass | 1    | 55     | 60.10 | <0.0001 |

**Table S3.** Comparison of continuous temperature data of Frolich1 and Frolich2 hive groups before and during overwintering in a warehouse. Data were collected exactly one year apart. “Transf.” refers to the data transformation to improve normality

| Period              | Dep. var.   | Transf. | Factors                                  | Num. d.f. | Den. d.f. | F     | P       |
|---------------------|-------------|---------|------------------------------------------|-----------|-----------|-------|---------|
| 11 Oct.-<br>15 Nov. | Temp. ampl. | log     | Treatment                                | 1         | 31.7      | 10.33 | 0.0030  |
|                     |             |         | Date                                     | 7         | 28.4      | 3.97  | 0.0039  |
|                     |             |         | Treatment*Date                           | 7         | 28.4      | 13.85 | <0.0001 |
|                     |             |         | Fall ad. mass                            | 1         | 37.1      | 1.46  | 0.2351  |
|                     | Temp. avg   | none    | Treatment                                | 1         | 26.4      | 9.39  | 0.0050  |
|                     |             |         | Date                                     | 7         | 26.8      | 11.30 | <0.0001 |
|                     |             |         | Treatment*Date                           | 7         | 26.8      | 18.28 | <0.0001 |
|                     |             |         | Fall ad. mass                            | 1         | 34.7      | 7.98  | 0.0078  |
| 25 Nov.-<br>19 Jan. | Temp. avg   | log     | Treatment, Date,<br>Post-winter ad. mass |           |           |       | NS      |

**Table S4.** Pesticide residue, in ppb±s.e, found in bee bread. Results for 2014-15 show averages across multiple samples before and after overwintering; only single composite samples from 2015-16 were submitted. We assumed if a given compound was not detected, the concentration was “0”, and if trace amounts were detected, then the concentration was (LD -1) where LD is Limit of Detection. A dash indicates no detection.

| Compound        | Month | 2014-15 |       |         |          | 2015-16  |          |          |
|-----------------|-------|---------|-------|---------|----------|----------|----------|----------|
|                 |       | AG1     | AG2   | Legge   | Frolich1 | WestThil | EastThil | Frolich2 |
| 2,4 DMPF        | Oct   | 19±5    | 37±12 | 95±48   | 67±21    | 116      | 130      | 58       |
|                 | Jan   | 35±18   | 15±8  | 23±5    | 37±11    | -        | -        | -        |
| Chloropyrifos   | Oct   | 34±34   | 24±24 | 11±11   | 8±8      | 21.3     | 17.9     | 144      |
|                 | Jan   | 6±6     | 4±4   | 29±29   | -        | -        | -        | -        |
| Coumaphos       | Oct   | -       | 1±1   | 4±4     | 7±6      | -        | -        | -        |
|                 | Jan   | -       | -     | 4±0     | 9±9      | -        | -        | -        |
| Cyhalothrin     | Oct   | -       | -     | -       | -        | -        | 3.8      | -        |
|                 | Jan   | -       | -     | -       | 3±3      | -        | -        | -        |
| Cyprodinil      | Oct   | -       | -     | -       | -        | -        | -        | 87.6     |
|                 | Jan   | 1±1     | -     | -       | 1±1      | -        | -        | -        |
| Fenpyroximate   | Oct   | -       | -     | -       | 217±217  | -        | -        | -        |
|                 | Jan   | -       | -     | 12±5    | 481±244  | -        | -        | -        |
| Fluridone       | Oct   | -       | -     | 219±219 | -        | -        | -        | -        |
|                 | Jan   | 4±4     | -     | -       | -        | -        | -        | -        |
| Fluvalinate     | Oct   | 15±15   | -     | -       | 46±46    | -        | -        | -        |
|                 | Jan   | 10±10   | -     | -       | 101±59   | -        | -        | -        |
| Methoxyfenozide | Oct   | -       | -     | -       | 98±98    | -        | -        | 73       |
|                 | Jan   | 66±66   | -     | -       | 156±80   | -        | -        | -        |
| Pendimethalin   | Oct   | 20±5    | -     | -       | 67±21    | -        | -        | 112      |
|                 | Jan   | 35±18   | -     | -       | 37±11    | -        | -        | -        |
| Tebuconazole    | Oct   | 34±34   | 14±14 | 17±17   | 8±8      | -        | 7        | -        |
|                 | Jan   | 6±6     | 30±22 | 22±11   | -        | -        | -        | -        |
| Thymol          | Oct   | -       | 82±82 | 70±70   | 7±6      | 851      | 221      | -        |
|                 | Jan   | -       | -     | 95±95   | 9±9      | -        | -        | -        |

**Table S5.** Pesticide residue, in ppb, found in composite wax samples in 2014-15. We assumed if trace amounts were detected, then the concentration was (LD -1) where LD is Limit of Detection. A dash indicates no detection.

| Compound       | Month | 2014-15 |      |       |          |
|----------------|-------|---------|------|-------|----------|
|                |       | AG1     | AG2  | Legge | Frolich1 |
| 2,4 DMPF       | Oct   | 427     | 263  | 1070  | 723      |
|                | Jan   | 437     | 3370 | 332   | 502      |
| Boscalid       | Oct   | 25.7    | -    | -     | -        |
|                | Jan   | 15.3    | 42.4 | 58.2  | 46.0     |
| Carbendazim    | Oct   | 7.5     | 15.4 | 24.7  | 19.9     |
|                | Jan   | TR      | 5.7  | 8.3   | 7.4      |
| Chlorferone    | Oct   | -       | 146  | -     | -        |
|                | Jan   | -       | 1080 | -     | -        |
| Chlorothalonil | Oct   | 246     | 204  | 173   | 340      |
|                | Jan   | 215     | -    | 171   | 170      |
| Chloropyrifos  | Oct   | -       | 16.0 | -     | -        |
|                | Jan   | 14.3    | 10.9 | -     | 10.2     |
| Coumaphos      | Oct   | 145     | 202  | 21.0  | 14.0     |
|                | Jan   | 11      | 641  | 16.9  | 13.4     |
| Coumaphos ox.  | Oct   | 231     | 117  | 54.7  | 31.3     |
|                | Jan   | -       | 78.0 | 16.4  | 19.4     |
| Cyprodinil     | Oct   | 15.7    | 32.4 | -     | 60.0     |
|                | Jan   | -       | -    | 15.4  | -        |
| Fenpyroximate  | Oct   | 124     | 24.5 | 58.9  | 73.1     |
|                | Jan   | 43.6    | 66.3 | 117   | 58.3     |
| Fluridone      | Oct   | 1740    | -    | 531   | 750      |
|                | Jan   | -       | 484  | 371   | -        |
| Pendimethalin  | Oct   | -       | -    | -     | 90.2     |
|                | Jan   | -       | -    | -     | -        |
| Pyraclostrobin | Oct   | -       | -    | 19.1  | -        |
|                | Jan   | -       | 20.4 | 56.7  | 37.1     |
| Tebuconazole   | Oct   | -       | 22.3 | -     | -        |
|                | Jan   | -       | 17.5 | -     | -        |
| Thymol         | Oct   | 1950    | 3520 | 3020  | 2250     |
|                | Jan   | 1790    | 2250 | 2870  | 4320     |
